# Supplementary material
Source: PubMed Central journal article supplement (PMC5833002)
Supplement: oc7b00569_si_001.pdf [file oc7b00569_si_001.pdf]

## Supplementary Information

### An Aqueous Inorganic Polymer Binder for High Performance Lithium-Sulfur Batteries with Flame-Retardant Properties

Guangmin Zhou,<sup>†,‡</sup> Kai Liu,<sup>†,‡</sup> Yanchen Fan,<sup>‡,§</sup> Mengqi Yuan,<sup>//</sup> Bofei Liu,<sup>†</sup> Wei Liu,<sup>†</sup> Feifei Shi,<sup>†</sup> Yayuan Liu,<sup>†</sup> Wei Chen,<sup>†</sup> Jeffrey Lopez,<sup>⊥</sup> Denys Zhuo,<sup>†</sup> Jie Zhao,<sup>†</sup> Yuchi Tsao,<sup>†</sup> Xuanyi Huang,<sup>†</sup> Qianfan Zhang,<sup>\*,§</sup> and Yi Cui<sup>\*,†,#</sup>

<sup>†</sup>Department of Materials Science and Engineering, Stanford University, Stanford, California 94305, United States

<sup>§</sup>School of Materials Science and Engineering, Beijing University of Aeronautics and Astronautics, Beijing, 100191, P. R. China

<sup>//</sup>State Key Laboratory of Explosion Science and Technology, Beijing Institute of Technology, Beijing, 100081, P. R. China

<sup>⊥</sup>Department of Chemical Engineering, Stanford University, Stanford, California 94305, United States

<sup>#</sup>Stanford Institute for Materials and Energy Sciences, SLAC National Accelerator Laboratory, 2575 Sand Hill Road, Menlo Park, California 94025, United States

\*Corresponding authors: [qianfan@buaa.edu.cn](mailto:qianfan@buaa.edu.cn), [yicui@stanford.edu](mailto:yicui@stanford.edu).

**Table S1.** The binding strength between different Li-S species and two kinds of polymers (unit: eV).

|      | Li <sub>2</sub> S | Li <sub>2</sub> S <sub>2</sub> | Li <sub>2</sub> S <sub>4</sub> | Li <sub>2</sub> S <sub>6</sub> | Li <sub>2</sub> S <sub>8</sub> |
|------|-------------------|--------------------------------|--------------------------------|--------------------------------|--------------------------------|
| APP  | 2.30              | 2.25                           | 2.19                           | 2.17                           | 2.16                           |
| PVDF | 0.72              | 0.74                           | 0.61                           | 0.58                           | 0.59                           |

**Table S2.** The Bader charge variances for the key atoms in two kinds of polymers. Here, the Bader charge variance  $\Delta e_B$  is expressed as the charge difference between the specified atom in the polymer and in an isolated state. “+” and “-” means the atom gains and loses electrons in the polymer, respectively.

|              | APP   |       |       | PVDF |       |       |
|--------------|-------|-------|-------|------|-------|-------|
|              | Bond  | O     | P     | Bond | F     | C     |
| $\Delta e_B$ | -O-P- | +1.40 | -3.47 | -C-F | +0.59 | -1.05 |

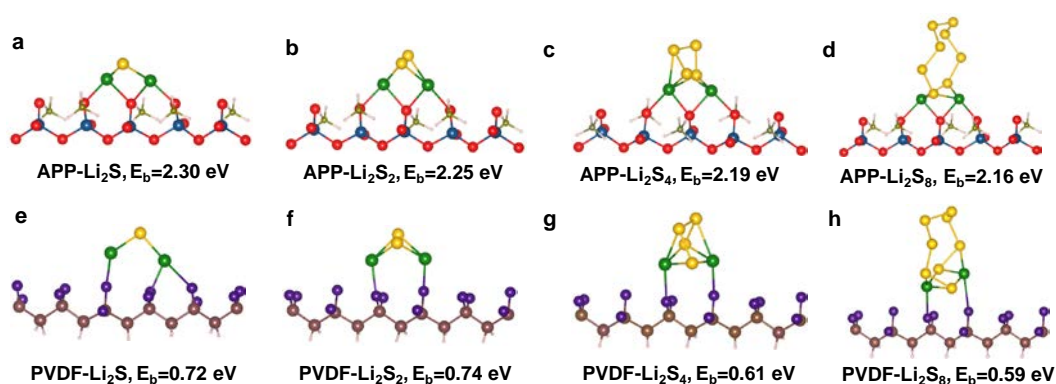

**Figure S1.** The adsorption conformations and binding strengths for (a-d) APP and (e-h) PVDF binders with Li-S species.

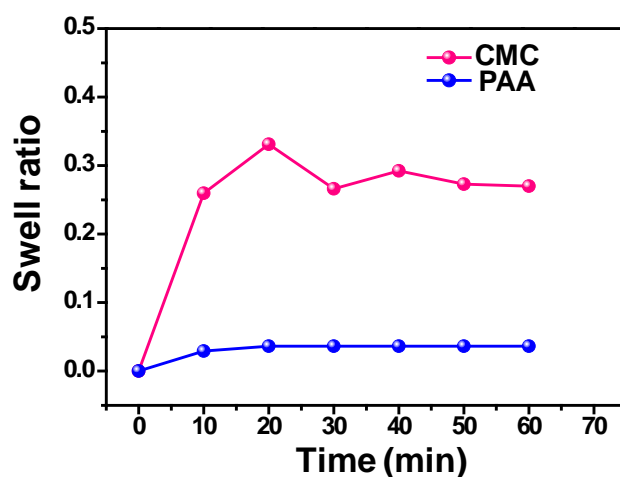

**Figure S2.** Swelling ratios of the CMC and PAA binders.

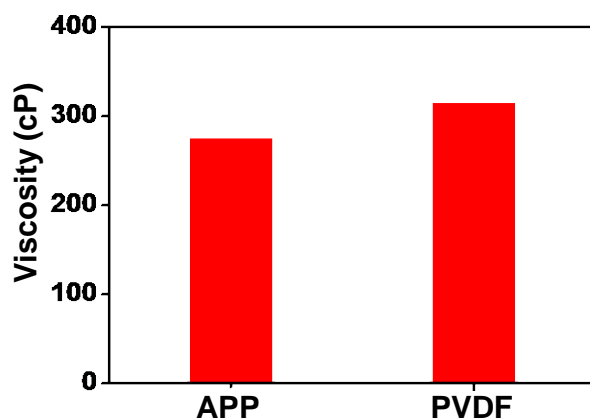

**Figure S3.** Viscosity of the 5 wt% APP and PVDF binder solutions.

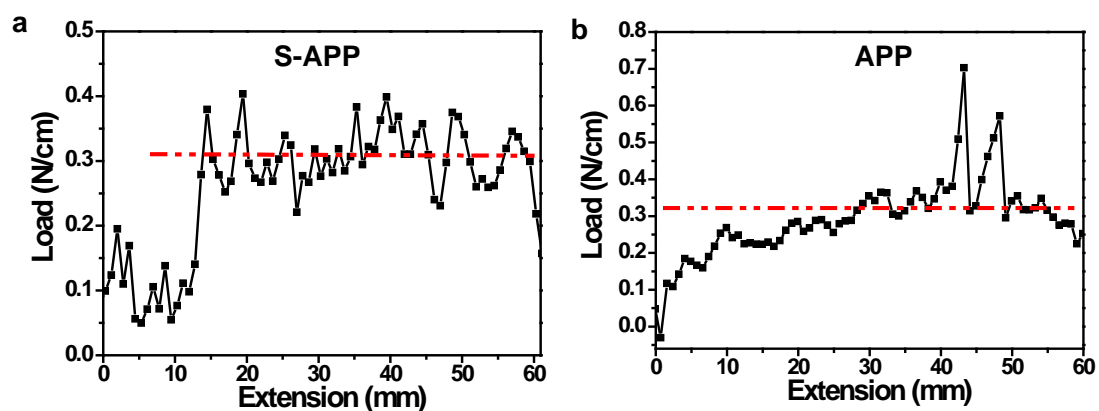

**Figure S4.** Adhesion strength of the (a) S-APP electrode and (b) APP to the current collector. The dotted line showing the average adhesion strength for S-APP and APP to the current collector.

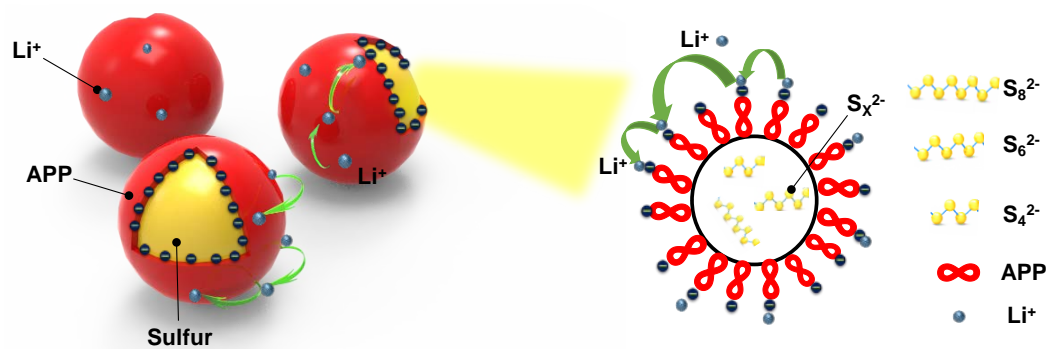

**Figure S5.** Schematic illustration of the functions of the APP binder in facilitating lithium ion transport due to the negatively charged side chain of APP.

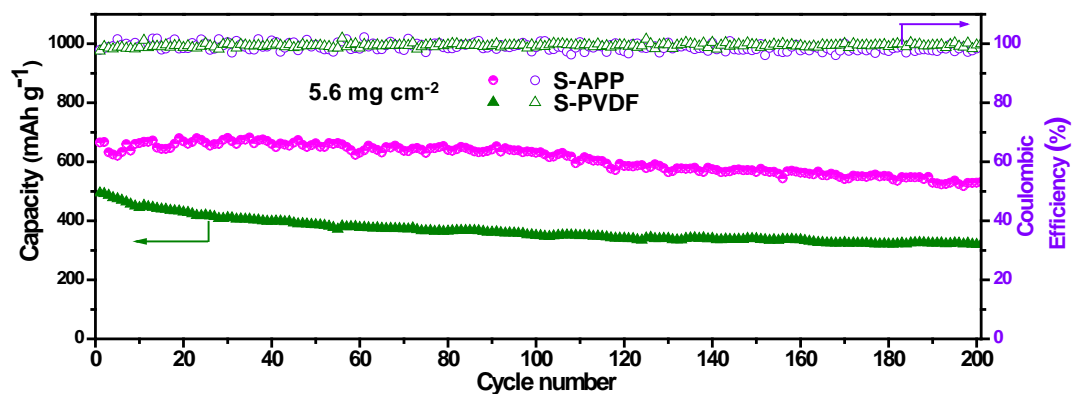

**Figure S6.** Long-term cycling stability and Coulombic efficiency of the S-APP and S-PVDF electrodes with a sulfur mass loading of  $5.6 \text{ mg cm}^{-2}$  at 0.5C for 200 cycles.

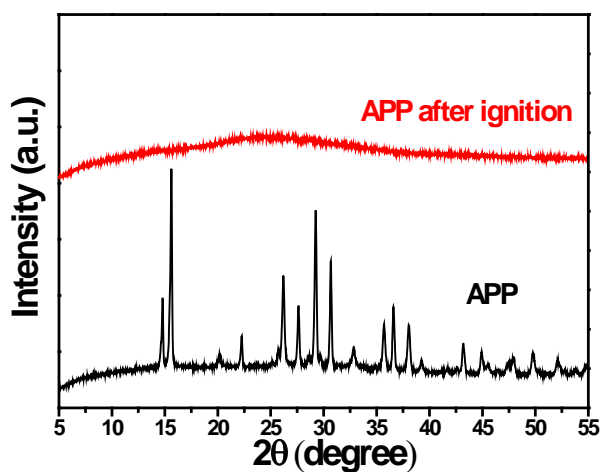

**Figure S7.** XRD patterns of the APP and its ignition product.

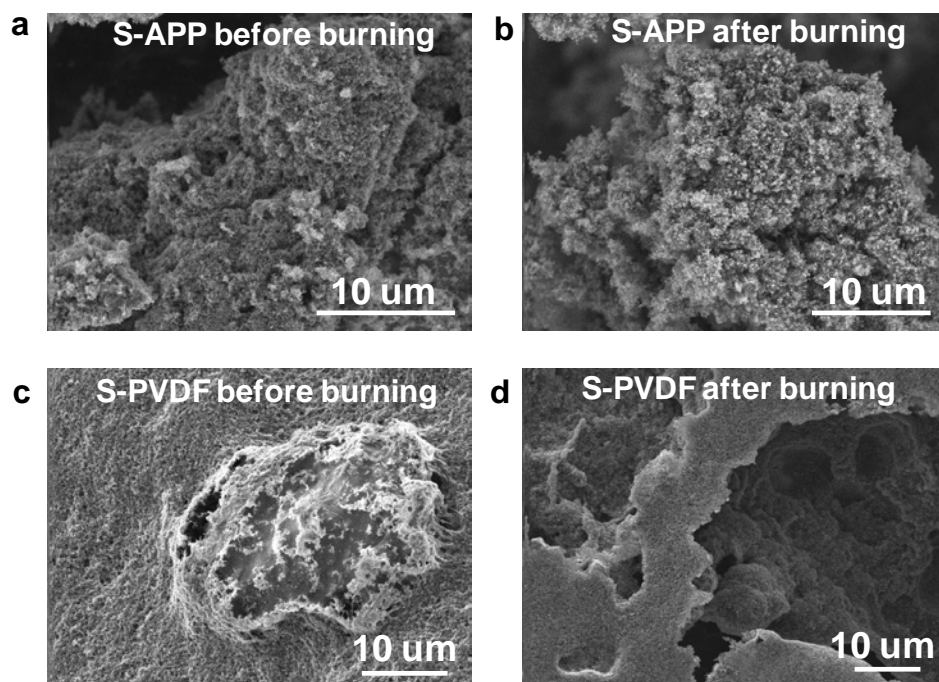

**Figure S8.** SEM images of the S-APP electrode (a) before and (b) after burning. SEM images of the S-PVDF electrode (c) before and (d) after burning.
